# Supplementary material for: Aβ-Induced Damage Memory in hCMEC/D3 Cells Mediated by Sirtuin-1
Source: PubMed Central journal article supplement (PMC7662699; doi:10.3390/ijms21218226), 2020-11-03
Supplement: ijms-21-08226-s001.pdf [file ijms-21-08226-s001.pdf]

## Supplementary data

# **A $\beta$ -induced damage memory in hCMEC/D3 cell mediated by sirtuin-1**

**Authors: HaoChen Liu, Yixuan Zhang, Hong Zhang, Sheng Xu, Huimin Zhao and XiaoQuan Liu.\***

Center of Drug Metabolism and Pharmacokinetics, China Pharmaceutical University, Nanjing, 210009, China

E-Mail address: haochenliu@cpu.edu.cn (HCL); yxzhang@stu.cpu.edu.cn (YZZ); 296481679@qq.com (HZ);

570302057@qq.com (SX); 1060046870@qq.com (HMZ) lxq@cpu.edu.cn (XQL, Corresponds author).

\* Corresponding author: lxq@cpu.edu.cn (XQL, Corresponds author). Tel.: + 86-25-83271260

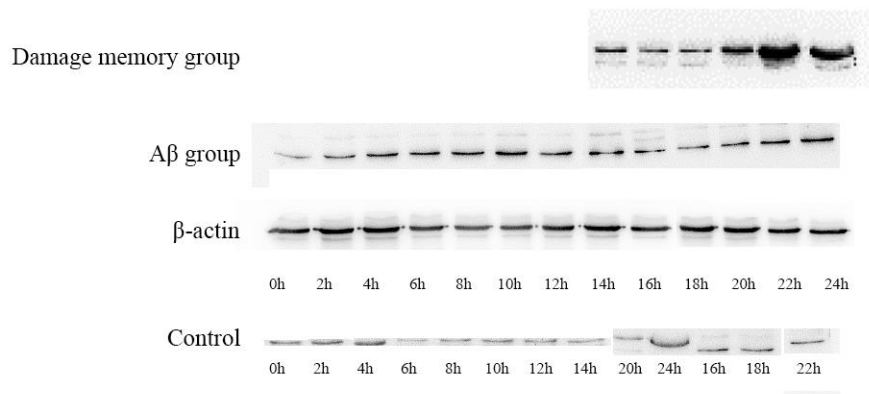

**Figure S1.** the time course of  $p66^{\text{SHC}}$  levels in control group,  $A\beta$  group and damage memory group.

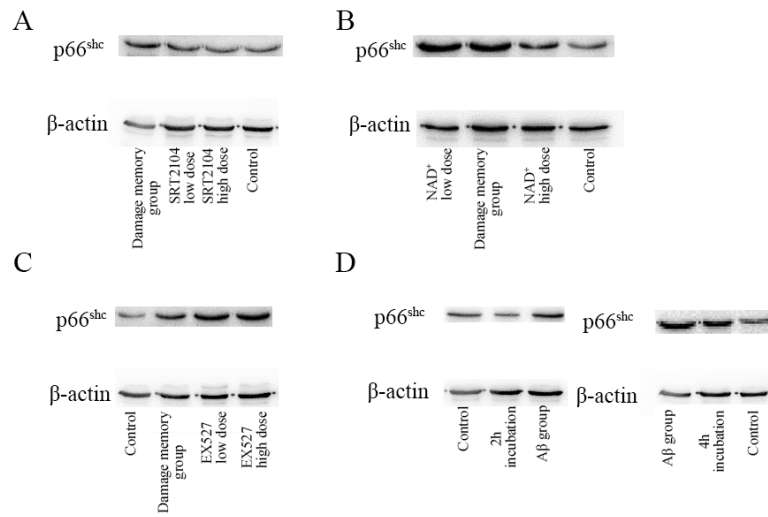

**Figure S2.** A: the change of  $p66^{\text{SHC}}$  in SRT2104 treated hCMEC/D3 cell. B: the change of  $p66^{\text{SHC}}$  in NAD<sup>+</sup> supplement treated hCMEC/D3 cell. C: the change of  $p66^{\text{SHC}}$  in EX527 treated hCMEC/D3 cell. D: the results of  $p66^{\text{SHC}}$  level in the experimental validation of cerebrovascular endothelial cell damage memory formation time.

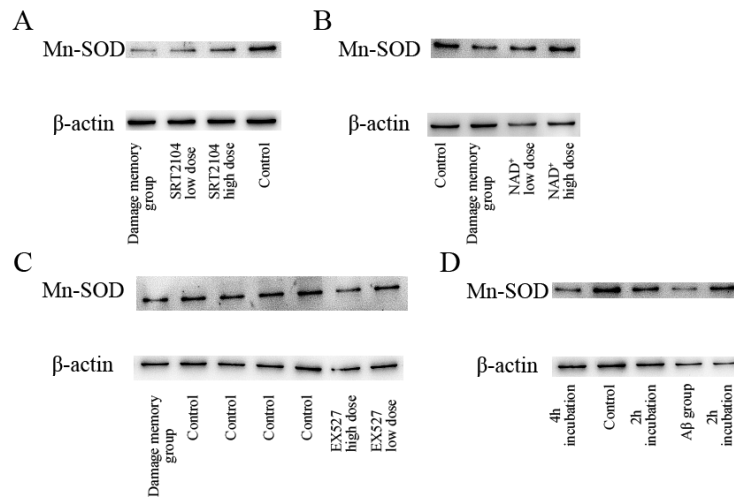

**Figure S3.** A: the change of Mn-SOD in SRT2104 treated hCMEC/D3 cell. B: the change of Mn-SOD in NAD<sup>+</sup> supplement treated hCMEC/D3 cell. C: the change of Mn-SOD in EX527 treated hCMEC/D3 cell. D: the results of Mn-SOD level in the experimental validation of cerebrovascular endothelial cell damage memory formation time.

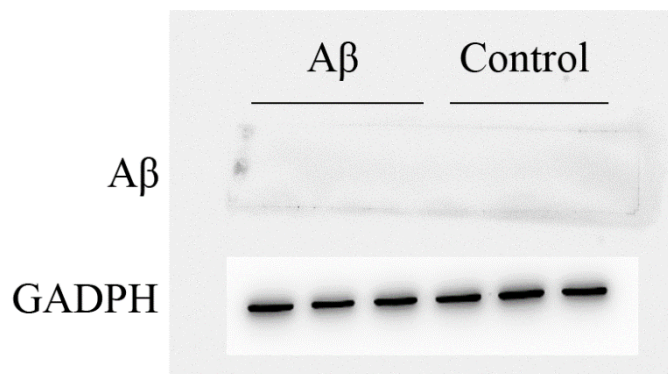

**Figure S4.** the intracellular Aβ accumulation in Aβ group and control group.

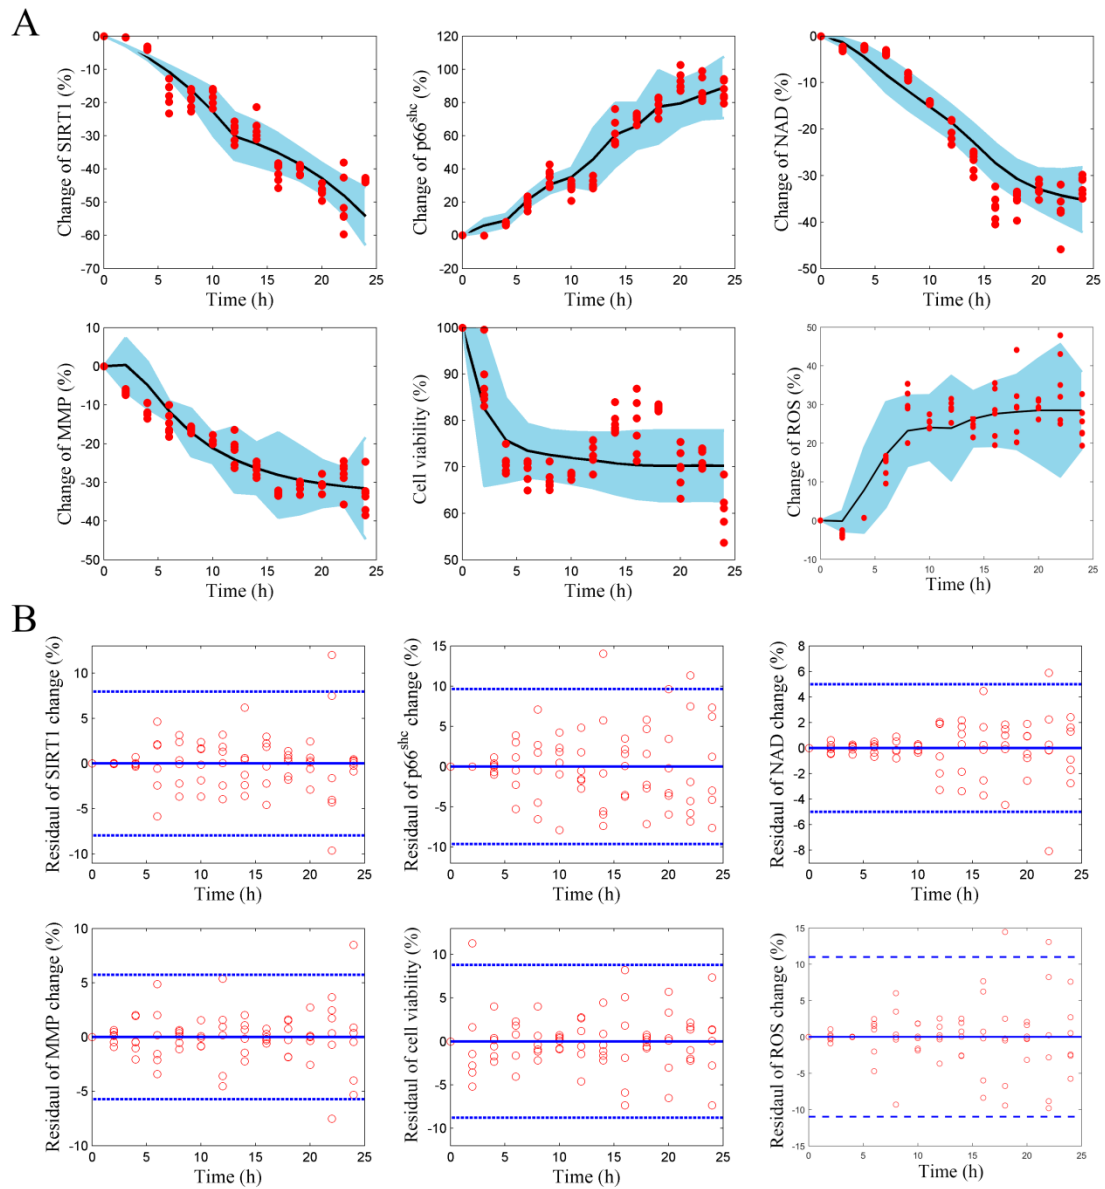

**Figure S5.** A: visual predicted check (VPC) for sirt-1, p66<sup>shc</sup>, ROS, NAD<sup>+</sup>, MMP, and cell vitality. The shaded area represents the 95% confidence interval of the simulated median value. The line represents the median value of observed value. The red scatters represent observed values. B: scatter plots of predicted residuals vs. time for sirt-1, p66<sup>shc</sup>, ROS, NAD<sup>+</sup>, MMP, and cell vitality.

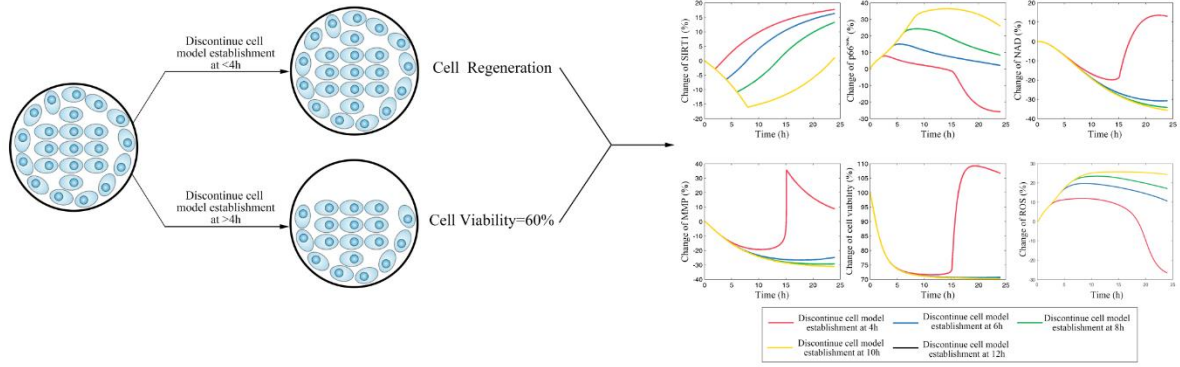

**Figure S6.** the simulation results for scenario I which investigate the time of cerebrovascular endothelial cell damage memory formation.

**Table S1.** mechanism based kinetic process model parameters and bootstrap validation.

| Parameters              | Estimate | CV     | CI       |       | Bootstrap |
|-------------------------|----------|--------|----------|-------|-----------|
|                         |          |        | LL       | UL    |           |
| $k_{in}^{SIRT1}$        | 0.02     | 77.05% | 4.73E-03 | 0.04  | 0.02      |
| $E_{A\beta}$            | -0.63    | 77.05% | -1.12    | -0.15 | -0.63     |
| $k_{out}^{SIRT1}$       | 0.10     | 35.96% | 0.07     | 0.14  | 0.11      |
| $k_{in}^{p66^{SHC}}$    | 0.06     | 65.20% | 0.02     | 0.11  | 0.06      |
| $k_{p66^{SHC}}^{SIRT1}$ | 28.29    | 67.40% | 9.22     | 47.36 | 28.29     |
| $k_{p66^{SHC}}^{NAD^+}$ | 13.05    | 81.77% | 2.38     | 23.73 | 13.50     |
| $k_{out}^{p66^{SHC}}$   | 1.42     | 7.29%  | 1.31     | 1.52  | 1.42      |
| $k_{in}^{ROS}$          | 1.11     | 0.22%  | 1.10     | 1.11  | 1.11      |
| $E_{max}^{p66^{SHC}}$   | 0.32     | 19.86% | 0.26     | 0.38  | 0.35      |
| $EC_{50}^{p66^{SHC}}$   | 0.11     | 96.27% | 4.01E-03 | 0.21  | 0.11      |
| $k_{out}^{p66^{SHC}}$   | 1.11     | 0.22%  | 1.10     | 1.11  | 1.11      |
| $k_{in}^{NAD^+}$        | 0.26     | 58.87% | 0.11     | 0.41  | 0.27      |
| $k_{out}^{NAD^+}$       | 0.21     | 78.28% | 0.05     | 0.38  | 0.23      |
| $k_{in}^{MMP}$          | 0.86     | 88.70% | 0.05     | 1.58  | 0.71      |
| $E_{max}^{ROS}$         | 1.11     | 0.15%  | 1.17     | 1.17  | 1.04      |
| $EC_{50}^{ROS}$         | 0.03     | 0.11%  | 0.03     | 0.03  | 0.03      |
| $k_{out}^{MMP}$         | 1.17     | 92.09% | 0.03     | 2.18  | 1.02      |
| $k_{in}^{MTT}$          | 0.94     | 83.68% | 0.15     | 1.72  | 0.94      |
| $E_{max}^{MMP}$         | 0.26     | 15.85% | 0.21     | 0.30  | 0.26      |
| $EC_{50}^{MMP}$         | 0.04     | 78.74% | 0.01     | 0.08  | 0.04      |
| $k_{out}^{MTT}$         | 1.04     | 78.53% | 0.22     | 1.85  | 1.04      |
